Abstract P6072 – Table 1. Characterization of Bleeding Events

|                                      | Major Bleeds          |                       |                        |                        | CRNM Bleeds           |                       |                        |                        |
|--------------------------------------|-----------------------|-----------------------|------------------------|------------------------|-----------------------|-----------------------|------------------------|------------------------|
|                                      | Reduced Dose          |                       | Full Dose              |                        | Reduced Dose          |                       | Full Dose              |                        |
|                                      | Betrixaban<br>(N=730) | Enoxaparin<br>(N=725) | Betrixaban<br>(N=2986) | Enoxaparin<br>(N=2991) | Betrixaban<br>(N=730) | Enoxaparin<br>(N=725) | Betrixaban<br>(N=2986) | Enoxaparin<br>(N=2991) |
| # Bleeds                             | 10 (1.4%)             | 5 (0.7%)              | 15 (0.5%)              | 16 (0.5%)              | 25 (3.4%)             | 5 (0.7%)              | 69 (2.3%)              | 34 (1.1%)              |
| Results in death                     | 1 (10.0%)             | 0                     | 0                      | 1 (6.3%)               | 0                     | 0                     | 0                      | 0                      |
| Severity                             |                       |                       |                        |                        |                       |                       |                        |                        |
| Mild                                 | 0                     | 0                     | 1 (6.7%)               | 2 (12.5%)              | 10 (40.0%)            | 1 (20.0%)             | 29 (42.0%)             | 16 (47.1%)             |
| Moderate                             | 4 (40.0%)             | 3 (60.0%)             | 5 (33.3%)              | 4 (25.0%)              | 9 (36.0%)             | 3 (60.0%)             | 34 (49.3)              | 12 (35.3%)             |
| Severe                               | 4 (40.0%)             | 2 (40.0%)             | 8 (53.3%)              | 7 (43.8%)              | 6 (24.0%)             | 1 (20.0%)             | 5 (7.2%)               | 5 (14.7%)              |
| Life Threatening                     | 2 (20.0%)             | 0                     | 1 (6.7%)               | 3 (18.8%)              | 0                     | 0                     | 0                      | 0                      |
| Requires or Prolongs Hospitalization | 6 (60.0%)             | 1 (20.0%)             | 6 (40.0%)              | 5 (31.3%)              | 4 (16.0%)             | 2 (40.0%)             | 7 (10.1%)              | 6 (17.6%)              |
| Requires Medical Intervention        | 7 (70.0%)             | 2 (40.0%)             | 10 (66.7%)             | 9 (56.3%)              | 10 (17.2%)            | 3 (60.0%)             | 25 (43.1%)             | 20 (58.8%)             |
| Study Drug Interrupted               | 1 (10.0%)             | 0                     | 2 (13.3%)              | 0                      | 5 (20.0%)             | 1 (20.0%)             | 11 (15.9%)             | 3 (8.8%)               |
| Study Drug Withdrawn                 | 7 (70.0%)             | 3 (60.0%)             | 9 (60.0%)              | 12 (75.0%)             | 13 (52.0%)            | 2 (40.0%)             | 38 (55.1%)             | 21 (61.8%)             |

% total bleeds is based on number of subjects in each group. All other % are based on # bleeds in each group.

jects with creatinine clearance <30mL/min, the received 40mg of betrixaban or 20mg of enoxaparin. Descriptive statistics of location, severity and clinical consequences of major and CRNM bleeding are reported according to dose and treatment arm.

**Results:** Overall, 46 major and 133 CRNM bleeding events occurred. The most frequent site for major bleeding was gastrointestinal (59%) and intracranial (20%). One fatal bleed occurred in each treatment arm. For CRNM bleeding, the most common were hematuria (21%), epistaxis (13%), and gastrointestinal (13%). There were no differences in the severity or clinical consequences of bleeding events between the treatment arms. Although betrixaban resulted in an increase in CRNM bleeding, 87% were mild or moderate, 63% resolved without medical intervention, did not increase or prolong hospitalization or result in more interruption or withdrawal of study drug, compared to enoxaparin.

**Conclusion:** The severity and clinical sequelae of major and CRNM bleeding were similar between betrixaban and enoxaparin treatment arms.

**Funding Acknowledgements:** Funded by Portola Pharmaceuticals; APEX ClinicalTrials.gov number, NCT01583218

### P6073

#### Increased major bleeding risk with use of topical miconazole agents among users of oral anticoagulation: A population-level safety study

M. Lamberts, B. Zareini, A. Holt, J. Bjerre, C. Sindet-Petersen, L. Staerk, M.L. Hansen, J.B. Olesen, M. Schou, G. Gislason. *Herlev Hospital - Copenhagen University Hospital, Department of Cardiology, Copenhagen, Denmark*

**Background:** Summary of product characteristics discourages antifungal miconazole oral gel in warfarin users due to an enhanced anticoagulant effect. Disturbingly, case reports have described bleeding incidents with topical miconazole applied together with warfarin, but also in rivaroxaban users.

**Purpose:** We assessed potential adverse drug effects of commonly used over-the-counter antifungal topical miconazole among patients on oral anticoagulation.

**Methods:** In Danish nationwide databases, we identified all patients initiated on oral anticoagulation for either venous thromboembolism or atrial fibrillation between 2012–2017. Concomitant prescribed topical miconazole treatment (oral or on the skin) during follow-up was recorded. We analyzed the risk of major bleeding (i.e. hospitalized) using a multivariable Cox regression model adjusted for age, gender, prior bleeding, hypertension, use of antiplatelets, alcohol abuse, use of non-steroidal anti-inflammatory drugs, chronic renal disease, liver disease and prior stroke.

**Results:** Among 234,533 patients included (mean age 69 years, 55% males), 181,719 (77%) were on vitamin K antagonists, 16,178 (7%) on apixaban, 22,353 (10%) on rivaroxaban and 14,283 (6%) on dabigatran. During a mean follow-up of 5.8 years, 12,859 (5.5%) of patients were administered topical (oral gel or external skin treatment) miconazole antifungal medication in 4 (skin treatment) to 6 (oral

| Oral anticoagulation                                   | Topical miconazole administration | Incidence rates per 100 person-years (no. events) | Hazard ratio [95% confidence interval] |
|--------------------------------------------------------|-----------------------------------|---------------------------------------------------|----------------------------------------|
| Vitamin K antagonist                                   | None                              | 2.5 (31,373)                                      | reference                              |
|                                                        | To the skin                       | 6.2 (81)                                          | 1.80 [1.44-2.23]                       |
|                                                        | Oral gel                          | 18.5 (87)                                         | 5.65 [4.56-6.97]                       |
| Any Non-Vitamin K antagonist oral anticoagulant (NOAC) | None                              | 2.5 (3,059)                                       | Reference                              |
|                                                        | To the skin                       | 3.4 (29)                                          | 2.17 [1.51-3.13]                       |
|                                                        | Oral gel                          | 10.7 (17)                                         | 2.64 [1.64-4.25]                       |
| Apixaban                                               | None                              | 2.6 (740)                                         | reference                              |
|                                                        | To the skin                       | 6.7 (6)                                           | 1.68 [0.75-3.76]                       |
|                                                        | Oral gel                          | 13.5 (6)                                          | 3.23 [1.45-7.22]                       |
| Rivaroxaban                                            | None                              | 2.5 (1,120)                                       | reference                              |
|                                                        | To the skin                       | 9.1 (11)                                          | 2.18 [1.20-3.94]                       |
|                                                        | Oral gel                          | 6.7 (4)                                           | 1.59 [0.60-4.25]                       |
| Dabigatran                                             | None                              | 2.4 (1,199)                                       | reference                              |
|                                                        | To the skin                       | 9.1 (12)                                          | 2.59 [1.47-4.58]                       |
|                                                        | Oral gel                          | 12.6 (7)                                          | 3.51 [1.67-7.37]                       |

Risk of major bleeding

gel) week periods. Incidence rates of major bleeding were 2.5 (no. events 34,432) and 9.4 per 100 person-years (no. events 214) when not exposed and exposed to topical miconazole, respectively. The corresponding hazard ratio (HR) was 2.51 [95% confidence interval (CI) 2.19–2.87]. Major bleeding risks associated with use of specific oral anticoagulants and topical miconazole administrations are presented below.

**Conclusions:** Topical miconazole agents, especially the oral gel, were significantly associated with major bleeding complications in patients taking oral anticoagulants. Caution is advised when treating fungal infection with topical miconazole in patients on any oral anticoagulants.

### P6074

#### Differences between hospitalised vs. outpatient management amongst european patients with atrial fibrillation: the EORP-AF general long-term registry

M. Proietti<sup>1</sup>, C. Laroche<sup>2</sup>, E. Fantecchi<sup>3</sup>, M. Zdravkovic<sup>4</sup>, R. Lenarczyk<sup>5</sup>, O. Piot<sup>6</sup>, A.P. Maggioni<sup>7</sup>, G.Y.H. Lip<sup>1</sup>, G. Boriani<sup>3</sup>. <sup>1</sup>University of Birmingham, Institute of Cardiovascular Sciences, Birmingham, United Kingdom; <sup>2</sup>European Society of Cardiology, EURObservational Research Programme Department, Sophia-Antipolis, France; <sup>3</sup>University of Modena & Reggio Emilia, Modena, Italy; <sup>4</sup>University Hospital Medical Center Bezanijska Kosa, Belgrade, Serbia; <sup>5</sup>Silesian Center for Heart Diseases (SCHD), Zabrze, Poland; <sup>6</sup>Centre Cardiologique du Nord, Saint-Denis, France; <sup>7</sup>ANMCO Foundation For Your Heart, Florence, Italy. On behalf of EORP-AF General Long-Term Registry Investigators

**Introduction:** Atrial fibrillation (AF) patients are frequently hospitalized due to both AF-related and non-AF related reasons. Also, hospitalized patients are more severely ill than those non-hospitalized. These factors can influence prescription and use of oral anticoagulant (OAC) drugs. In this analysis, we studied differences in clinical profile and use of OAC in a large contemporary cohort of European AF patients.

**Methods:** Baseline characteristics, use of antithrombotic drugs and clinical management between AF patients who were hospitalized vs. outpatients were studied in the EURObservational Research Programme in AF General Long-Term cohort.

**Results:** Among the 11096 enrolled AF patients, 5792 (52.2%) were hospitalised, while 5303 (47.8%) were outpatients. When compared to hospitalised AF patients (Table), outpatients were older, less likely female and less likely to be diagnosed with a major cardiac condition (coronary artery disease, heart failure, valvular disease, dilated cardiomyopathy; all  $p < 0.001$ ), except for hypertension which was more common in outpatients (Table). Hospitalised patients were more likely symptomatic (Table). The proportion with CHA2DS2-VASc  $\geq 2$  was similar ( $p = 0.561$ ), but those with HAS-BLED  $\geq 3$  was higher among hospitalised patients than in outpatients (19.8% vs. 14–9%;  $p < 0.001$ ). Hospitalised patients were more likely treated with vitamin K antagonist (VKA) than outpatients (52.8% vs. 47.4%;  $p < 0.001$ ). Conversely, use of non-vitamin K antagonist oral anticoagulants (NOACs) were less prevalent in hospitalised patients (31.4% vs. 38.4%;  $p < 0.001$ ). Hospitalised patients were more likely prescribed antiarrhythmic drugs (33.7% vs. 21.3%;  $p < 0.001$ ) and have procedures (pharmacological/electrical cardioversion, catheter ablation) performed (all  $p < 0.001$ ). After adjustment with multiple risk factors, regression analysis found that hospitalised patients were more likely prescribed with OAC (odds ratio [OR]: 1.61, 95% confidence interval [CI]: 1.40–1.85) and NOACs than outpatients (OR: 1.34, 95% confidence interval: 1.18–1.52).

#### Baseline characteristics

|                | Hospitalised | Outpatients | p      |
|----------------|--------------|-------------|--------|
| Age, mean (SD) | 68.3 (11.8)  | 70.1 (10.9) | <0.001 |
| Female         | 42.1%        | 39.1%       | 0.001  |
| Hypertension   | 60.1%        | 64.7%       | <0.001 |
| Symptomatic AF | 64.7%        | 43.6%       | <0.001 |

AF = Atrial Fibrillation; SD = Standard Deviation.

**Conclusions:** Hospitalised AF patients were younger, but more burdened with concomitant comorbidities and a higher bleeding risk. After full adjustment, hospitalised patients were more likely prescribed with OAC and NOACs.
